# Supplementary material
Source: Springer Nature journal article supplement (https://www.springermedizin.de/resource/supplementary/12889_2009_2169_MOESM5_ESM.pdf/9484826)
Supplement: MOESM5 [file 9484826]

313  
abstracts identified  
from database search

165: no measure of  
association b/ alcohol and  
stroke

6: neither cohort nor case-  
control

7: less than three alcohol  
consumption levels

56: not enough info to  
quantify, for each alcohol  
group, consumption in  
g/day and assoc RR/OR

20: multiple articles on  
same study

5: other dimension of  
alcohol drinking (e.g.,  
binge drinking or drinking  
before the event)

17: data exclusively on  
*total-strokes* including  
unspecified strokes

11: systematic reviews/  
meta-analysis studies

Exclusions

26 studies identified  
for data abstraction (17 cohort and  
9 case-control studies; 20 studies  
identified ischemic and 16  
hemorrhagic strokes)
